# Supplementary material
Source: Elsevier journal article supplement (https://www.sciencedirect.com/science/article/pii/S0213005X21003864)
Supplement: mmc1 [file S0213005X21003864:mmc1.pdf]

## **ANEXO. FORMULARIO ENCUESTA ESTRONGILOIDIOSIS GEPI-SEIMC**

### **1. A qué tipo de hospital pertenece?**

- a) Hospital con más de 1.000 camas
- b) Hospital con entre 500-999 camas
- c) Hospital con entre 100-499 camas
- d) Hospital con menos de 100 camas.

### **2. ¿Su centro dispone de Microbiólogo de guardia?**

- a) Sí, de presencia física
- b) Sí, de presencia física, pero a tiempo parcial
- c) Sí, solo localizado
- d) No

### **3. Unidad asistencial en la que trabaja (se pueden marcar varias opciones):**

- a) Medicina Interna
- b) Microbiología y Parasitología
- c) Enfermedades Infecciosas
- d) Otras (especificar)

### **4. ¿Existe en el centro unidad especializada en enfermedades importadas?**

- a) Si
- b) No

### **5.Cuál es la principal actividad que desarrolla el laboratorio de Microbiología de su centro de trabajo?**

- a) Laboratorio asistencial con actividad vinculada a un único centro hospitalario.
- b) Laboratorio asistencial proveedor de servicios generales a diversos centros u hospitales
- c) Laboratorio de investigación.
- d) Otros (especificar)

### **6. La actividad del laboratorio de Microbiología de su centro de trabajo (márquese cuantas proceda):**

- a) Es exclusivamente hospitalaria.
- b) Combina atención hospitalaria y atención primaria.
- c) Actúa como laboratorio de referencia para otros centros en el ámbito local.
- d) Otros (especificar)

**7. ¿El laboratorio de Microbiología de su centro de trabajo cuenta con un microbiólogo específicamente dedicado a Parasitología Clínica?**

- a) Sí, a tiempo completo
- b) Sí, a tiempo parcial
- c) No hacemos diagnóstico parasitológico, lo derivamos a otro centro.
- d) Otros (especificar)

**8. En su centro el diagnóstico microbiológico de estrongiloidiasis se realiza: (marque todas las que proceda).**

- a) Sólo a petición del facultativo responsable.
- b) Dentro de los protocolos de cribado de enfermedades importadas del centro.
- c) Si el volante indica la existencia de eosinofilia, aunque no se haya solicitado.
- d) Si el diagnóstico clínico sugiere posible infección por *Strongyloides* aunque no se haya solicitado específicamente
- e) Otros: describir

**9. ¿Se realiza serología de *Strongyloides* en el laboratorio de Microbiología de su centro de trabajo?**

- a) Sí, el propio laboratorio dispone de una prueba serológica.
- b) No, pero se envía la muestra a un laboratorio de referencia
- c) Otras (especificar)

**10. ¿Existe un protocolo específico de cribado de estrongiloidiasis en su centro de trabajo? (marque los que corresponda).**

- a) En todo paciente procedente de zona endémica.
- b). En pacientes procedentes de forma endémica solo si:
  - i) son portadores de trasplante de órgano sólido o hematopoyético
  - ii) Infección por el VIH
  - iii) Otros factores de riesgo: esteroides, tratamiento biológico, quimioterapia

**11. ¿Está incluido el cribado de estrongiloidiasis dentro de los protocolos de asistencia a pacientes con COVID-19 de su centro?**

- a) Sí
- b) No

**12. ¿En caso afirmativo que método se utiliza? (Marque cuantas proceda)**

- a) Serología
- b) Cultivo de larvas de *Strongyloides* (método placa-agar)
- d) Coproparasitológico de rutina
- e) PCR de *Strongyloides* en heces

**13. ¿Ha tenido casos de coinfección *Strongyloides*/Covid-19 desde el inicio de la pandemia?**

- a) Sí
- b) No
- c) En caso afirmativo número orientativo:

**14. Si es afirmativa la respuesta anterior ¿Alguno de ellos desarrolló un síndrome de hiperinfección o de estrongiloidiasis diseminada?**

- a) Si
- b) No
- c) En caso afirmativo número orientativo:

**15. ¿Se produjeron fallecimientos atribuibles a la infestación masiva?**

- a) Si
- b) No

**16. Si la respuesta anterior es afirmativa, ¿Alguno de ellos desarrollo sepsis bacteriana?**

- a) Si
- b) No
- c) En caso afirmativo número orientativo:

**17. ¿En alguno de los casos en los que se produjo un síndrome de hiperinfección o de estrongiloidiasis diseminada, se utilizaron uno o varios de los siguientes fármacos para el tto de la COVID-19? (marque cuantas proceda)**

- a) Corticoides
- b) Tocilizumab u otro inhibidor de IL-6
- c) Anakinra
- d) Baricitinib

e) Otros ( Señalar):

**18. ¿Qué estrategia ha seguido en el manejo de la strongyloidiasis durante la pandemia COVID?:**

- a) No se ha realizado cribado en mi centro
- b) Se ha administrado tratamiento empírico a los pacientes sin realizar prueba diagnóstica
- c) Se ha realizado prueba diagnóstica para cribado antes de usar tratamiento para *Strongyloides*

**19. ¿En qué pacientes se ha realizado cribado o tratamiento empírico de *Strongyloides*? (se pueden marcar varias respuestas)**

- a) Sólo en los procedentes de Latinoamérica
- b) Sólo en los procedentes de África
- c) Sólo en los procedentes de Asia
- d) En los procedentes de Latinoamérica, África o Asia
- e) En los que llevaban menos de 5 años en España
- f) En los inmunosuprimidos

**3. Tratamiento utilizado:**

1. Ivermectina. Señalar dosis:

2. Albendazol

3. Ambos

4. Otros. Cuales:

**24. ¿Se dispone en su centro de stock de ivermectina?**

- 1. Sí
- 2. No, se solicita para cada caso que se necesita.
- 3. No sabe, no contesta
